# Supplementary material
Source: PubMed Central journal article supplement (PMC4375322)
Supplement: AEM.03721-14_zam999116185so1.pdf [file AEM.03721-14_zam999116185so1.pdf]

**Table S1. Nonhybrid *Epichloë* species used in this study**

| <b>Endophyte</b>       |                   | <b>ATCC or CBS</b> |                              |                            |
|------------------------|-------------------|--------------------|------------------------------|----------------------------|
| <b>species</b>         | <b>Isolate ID</b> | <b>number</b>      | <b>Host species</b>          | <b>Reference or source</b> |
| <i>E. amarillans</i>   | E52               | ATCC 200743        | <i>Sphenopholis obtusata</i> | (1-4)                      |
| <i>E. amarillans</i>   | E57               | ATCC 200744        | <i>Agrostis hyemalis</i>     | (1-5)                      |
| <i>E. amarillans</i>   | E4668             |                    |                              | (6)                        |
| <i>E. baconii</i>      | As6               | ATCC 90167         | <i>Agrostis capillaris</i>   | (7)                        |
| <i>E. baconii</i>      | E424              | ATCC 200746        | <i>Agrostis tenuis</i>       | (8)                        |
|                        | E357 =            |                    |                              |                            |
| <i>E. baconii</i>      | E1031             | ATCC 200745        | <i>Calamagrostis villosa</i> | (2-4, 6, 8)                |
|                        |                   |                    | <i>Brachyelytrum</i>         |                            |
| <i>E. brachyelytri</i> | E1040             | ATCC 200752        | <i>erectum</i>               | (2-4)                      |
|                        |                   |                    | <i>Brachyelytrum</i>         |                            |
| <i>E. brachyelytri</i> | E1045             | ATCC 200753        | <i>erectum</i>               | (3)                        |

---

|                        |       |             |                           |                        |
|------------------------|-------|-------------|---------------------------|------------------------|
|                        |       |             | <i>Brachyelytrum</i>      |                        |
| <i>E. brachyelytri</i> | E1124 | ATCC 201560 | <i>erectum</i>            | (3)                    |
|                        |       |             | <i>Brachyelytrum</i>      |                        |
| <i>E. brachyelytri</i> | E4804 |             | <i>erectum</i>            | (5)                    |
| <i>E. bromicola</i>    | E501  | ATCC 200749 | <i>Bromus erectus</i>     | (2, 4, 8)              |
| <i>E. bromicola</i>    | E502  | ATCC 200750 | <i>Bromus erectus</i>     | (5, 8)                 |
| <i>E. bromicola</i>    | E799  | ATCC 201559 | <i>Bromus benekenii</i>   | (8)                    |
| <i>E. elymi</i>        | E56   | ATCC 201551 | <i>Elymus canadensis</i>  | (1-5, 9)               |
| <i>E. elymi</i>        | E184  | ATCC 200850 | <i>Elymus virginicus</i>  | (2-4, 9)               |
|                        |       |             |                           | S. Marek, Oklahoma     |
| <i>E. elymi</i>        | EC1   |             | <i>Elymus canadensis</i>  | State University       |
|                        |       |             |                           | S. Marek, Oklahoma     |
| <i>E. elymi</i>        | EC4   |             | <i>Elymus canadensis</i>  | State University       |
|                        |       |             |                           | C.A. Young, The Samuel |
| <i>E. elymi</i>        | WWG2  |             | <i>Pascopyrum smithii</i> | Roberts Noble          |

---

---

Foundation, Oklahoma

|                    |          |            |                             |              |
|--------------------|----------|------------|-----------------------------|--------------|
| <i>E. festucae</i> | E189     | ATCC 90661 | <i>Festuca rubra</i>        | (1, 4, 8, 9) |
|                    |          | ATCC MYA-  |                             |              |
| <i>E. festucae</i> | E434     | 434        | <i>Festuca gigantea</i>     | (2, 8)       |
|                    |          | ATCC MYA-  |                             |              |
| <i>E. festucae</i> | E1035.33 | 446        | NA                          | (10)         |
| <i>E. festucae</i> | E2368    |            | NA                          | (5, 10)      |
| <i>E. festucae</i> | Fg1      |            | <i>Festuca glauca</i>       | (9)          |
|                    |          | ATCC MYA-  |                             |              |
| <i>E. festucae</i> | Fl1      | 3407       | <i>Festuca longifolia</i>   | (9, 11)      |
|                    |          |            | <i>Festuca rubra</i> subsp. |              |
| <i>E. festucae</i> | Frc5     |            | <i>commutata</i>            | (9)          |
|                    |          |            | <i>Festuca rubra</i> subsp. |              |
| <i>E. festucae</i> | Frc7     |            | <i>commutata</i>            | (9)          |
| <i>E. festucae</i> | Fr1      |            | <i>Festuca rubra</i>        | (9, 11)      |

---

---

|                     |         |             |                             |                        |
|---------------------|---------|-------------|-----------------------------|------------------------|
|                     |         |             | <i>Festuca rubra</i> subsp. |                        |
| <i>E. festucae</i>  | Frr1    |             | <i>rubra</i>                | (9)                    |
| <i>E. glyceriae</i> | E2772   | ATCC 200755 | <i>Glyceria striata</i>     | (2-4)                  |
|                     | E3601 = |             |                             |                        |
| <i>E. mollis</i>    | AL9924  |             | <i>Holcus mollis</i>        | (6)                    |
|                     |         |             | <i>Brachypodium</i>         |                        |
| <i>E. sylvatica</i> | E354    | ATCC 200748 | <i>sylvaticum</i>           | (2-4, 8)               |
|                     |         |             | <i>Brachypodium</i>         |                        |
| <i>E. sylvatica</i> | E503    | ATCC 200751 | <i>sylvaticum</i>           | (2-4, 8)               |
| <i>E. typhina</i>   | E8      | ATCC 200736 | <i>Lolium perenne</i>       | (3-5, 8, 9)            |
|                     |         |             | <i>Brachypodium</i>         |                        |
| <i>E. typhina</i>   | E505    | ATCC 200739 | <i>pinnatum</i>             | (2-4, 8)               |
|                     |         |             |                             | C.A. Young, The Samuel |
|                     |         |             |                             | Roberts Noble          |
| <i>E. typhina</i>   | ORE04   |             | <i>Dactylis glomerata</i>   | Foundation, Oklahoma   |

---

---

|                                            |          |             |                           |                                                                 |
|--------------------------------------------|----------|-------------|---------------------------|-----------------------------------------------------------------|
|                                            |          |             |                           | C.A. Young, The Samuel<br>Roberts Noble<br>Foundation, Oklahoma |
| <i>E. typhina</i>                          | ORE06    |             | <i>Dactylis glomerata</i> |                                                                 |
| <i>E. typhina</i> subsp.<br><i>clarkii</i> | Holcus 3 | ATCC 90168  | <i>Holcus lanatus</i>     | (7)                                                             |
| <i>E. typhina</i> subsp.<br><i>poae</i>    | E1022    | ATCC 201668 | <i>Poa nemoralis</i>      | (4, 8)                                                          |
| <i>E. typhina</i> subsp.<br><i>poae</i>    | E5819    |             | <i>Poa nemoralis</i>      | (5)                                                             |

---

**Table S2. *Epichloë* species from endophyte-infected plant material used in this study**

| <b>Species</b>                                  | <b>Isolate ID</b> | <b>Plant ID</b>                  | <b>Host Species</b>       | <b>Reference or source</b>                                              |
|-------------------------------------------------|-------------------|----------------------------------|---------------------------|-------------------------------------------------------------------------|
|                                                 |                   | Collected from<br>field plant in |                           | C.A. Young, The Samuel<br>Roberts Noble<br>Foundation, Oklahoma         |
| <i>E. typhina</i>                               | OR10              | Oregon                           | <i>Dactylis glomerata</i> |                                                                         |
| <i>E. typhina</i> subsp.<br><i>poae</i> BlaTG-1 | NFe671            | BRLA-671                         | <i>Bromus laevipes</i>    | (12)<br>C.A. Young, The Samuel<br>Roberts Noble<br>Foundation, Oklahoma |
| <i>E. amarillans</i>                            | NFe-708           | ELCA-708                         | <i>Elymus canadensis</i>  | C.A. Young, The Samuel<br>Roberts Noble<br>Foundation, Oklahoma         |
| <i>E. elymi</i>                                 | NFE728            | ELVI-728                         | <i>Elymus virginicus</i>  | Foundation, Oklahoma                                                    |
| <i>E. elymi</i>                                 | NFE741            | ELVI-741                         | <i>Elymus virginicus</i>  | C.A. Young, The Samuel                                                  |

---

|                                      |        |          |                          |                                                                                  |
|--------------------------------------|--------|----------|--------------------------|----------------------------------------------------------------------------------|
|                                      |        |          |                          | Roberts Noble<br>Foundation, Oklahoma<br>C.A. Young, The Samuel<br>Roberts Noble |
| <i>E. festucae</i> var. <i>lolii</i> | NFe243 | LOPE-243 | <i>Lolium perenne</i>    | Foundation, Oklahoma                                                             |
| <i>E. cabralii</i> BlaTG-2           | NFe661 | BRLA-661 | <i>Bromus laevipes</i>   | (12)                                                                             |
| <i>E. cabralii</i> BlaTG-2           | NFe688 | BRLA-688 | <i>Bromus laevipes</i>   | (12)                                                                             |
| <i>E. sp.</i> BlaTG-3 (G1)           | NFe79  | BRLA-79  | <i>Bromus laevipes</i>   | (12)                                                                             |
| <i>E. sp.</i> BlaTG-3 (G2)           | NFe82  | BRLA-82  | <i>Bromus laevipes</i>   | (12)                                                                             |
| <i>E. sp.</i> BlaTG-3 (G3)           | NFe83  | BRLA-83  | <i>Bromus laevipes</i>   | (12)<br>C.A. Young, The Samuel<br>Roberts Noble                                  |
| <i>E. canadensis</i>                 | NFe699 | ELCA-699 | <i>Elymus canadensis</i> | Foundation, Oklahoma<br>C.A. Young, The Samuel                                   |
| <i>E. amarillans</i>                 | NFe715 | ELCA-715 | <i>Elymus canadensis</i> | Roberts Noble                                                                    |

---

---

Foundation, Oklahoma

NFe1001 =

*E. canadensis* NFe727 ELCA-727 *Elymus canadensis* (13)

*E. canadensis* NFe716 ELCA-716 *Elymus canadensis* (13)

e19 = ATCC

*E. coenophiala* 90664 LOAR-00437 *Lolium arundinaceum* (4, 14)

*E. coenophiala* AR584 LOAR-00405 *Lolium arundinaceum* (15, 16)

LOAR-00245

(BarOptima

C.A. Young, The Samuel

PLUS E34,

Roberts Noble

*E. coenophiala* E34 Barenbrug *Lolium arundinaceum* Foundation, Oklahoma

*E. coenophiala* NFe45078 LOAR-00190 *Lolium arundinaceum* (17)

*E. sp. FaTG-2 G2* NFe45079 LOAR-00193 *Lolium arundinaceum* (17)

*E. sp. FaTG-2 G3* NFe45115 LOAR-00210 *Lolium arundinaceum* (17)

*E. sp. FaTG-3* NFe1100 LOAR-00488 *Lolium arundinaceum* (6, 16)

---



---

|                       |            |            |                         |                          |
|-----------------------|------------|------------|-------------------------|--------------------------|
| <i>E. sp. FaTG-4</i>  | e4305      | 4305       | <i>Lolium sp.</i>       | (6, 16)                  |
|                       | e167 = CBS |            |                         |                          |
| <i>E. uncinata</i>    | 102646     | FEPR-00400 | <i>Lolium pratense</i>  | (6, 18-20)               |
| <i>E. siegelii</i>    | e915       | 955        | <i>Lolium pratense</i>  | (20, 21)                 |
|                       |            |            |                         | C.L. Schardl, University |
| <i>E. sp.</i>         | e4678      | 4678       | <i>Poa alsodes</i>      | of Kentucky              |
|                       |            |            |                         | C.L. Schardl, University |
| <i>E. sp.</i>         | e4742      | 4742       | <i>Poa autumnalis</i>   | of Kentucky              |
|                       |            |            |                         | C.L. Schardl, University |
| <i>E. sp.</i>         | e4755      | 4755       | <i>Poa autumnalis</i>   | of Kentucky              |
| <i>E. sp. PauTG-1</i> | e55        |            | <i>Poa autumnalis</i>   | (4)                      |
|                       |            |            |                         | C.L. Schardl, University |
| <i>E. sp.</i>         | e4427      | 4427       | <i>Sphenopholis sp.</i> | of Kentucky              |
|                       |            |            |                         | C.L. Schardl, University |
| <i>E. sp.</i>         | e4768      | 4768       | <i>Festuca versuta</i>  | of Kentucky              |

---

---

|               |       |      |                          |                                         |
|---------------|-------|------|--------------------------|-----------------------------------------|
| <i>E. sp.</i> | e4672 | 4672 | <i>Agrostis hyemalis</i> | C.L. Schardl, University<br>of Kentucky |
| <i>E. sp.</i> | e4676 | 4676 | <i>Agrostis hyemalis</i> | C.L. Schardl, University<br>of Kentucky |

---

**Table S3. PCR primers used in this study**

| <b>Target<sup>1</sup></b> | <b>Primers used</b>                                                                     | <b>Product size (bp)<sup>2</sup></b> |
|---------------------------|-----------------------------------------------------------------------------------------|--------------------------------------|
| <i>dfsA</i>               | <i>dfsA</i> _F: ACGATGGATTGGTCTTCTC<br><i>dfsA</i> _R: GCAGACGAGCAACGCAACG              | 1362                                 |
| <i>qcrA</i>               | <i>qcrA</i> _F: TTCCGAGATTGTGCGAGG<br><i>qcrA</i> _R: TCACTCTCCTGCTGCTG                 | 639                                  |
| <i>perA</i> A1-domain     | <i>perA</i> -5'_F3: ATGACGAGCTCGGAGCGAGTTG<br><i>perA</i> -A1_R: AGACTTCCATCTGCACAGTATC | 1691                                 |
| <i>perA</i> T1-domain     | <i>perA</i> 1_4: TCGGAAAGGTCGGCTGTAC<br><i>perA</i> 1_R: TTGCTTCATCCCAGTCAGC            | 1073                                 |
| <i>perA</i> C-domain      | <i>perA</i> 2_F: ATCCAAGACGCATATCCC<br><i>perA</i> -C_R: ATCATCTCGGCGGCTTCC             | 878                                  |
| <i>perA</i> A2-domain     | <i>perA</i> 2_1: ACAGCTTTGCCACTCCAAG<br><i>perA</i> 2_R: ATCCACGCCTATGTAGCTC            | 2363                                 |
| <i>perA</i> M-domain      | <i>perA</i> 3_F: GCTTGCTGCGTTTGTAC<br><i>perA</i> -M_R: TGGGAAATCGGAACAAGG              | 1298                                 |
| <i>perA</i> T2-domain     | <i>perA</i> -T2_F: TCTTCAGGCATCGCAGGAAC<br><i>perA</i> -T2_R: TCGGCCACCTCCAGCCTGATG     | 600                                  |
| <i>perA</i> R*-domain     | <i>perA</i> 3_3: AGGAAGGCATCAGGCTGG<br><i>perA</i> 3_R: CTAGCCTCCAGATCTTGTG             | 1376                                 |
| <i>perA</i> R*-domain     | <i>perA</i> -T2_F: TCTTCAGGCATCGCAGGAAC                                                 | 742                                  |
| deletion                  | <i>perA</i> -17bp_R: GTACGGATAACCTCAAC                                                  | (E2368)                              |

|                  |                                       |         |
|------------------|---------------------------------------|---------|
| <i>perA-1</i>    | perA1_F: ATGGACGCGGAGCCTTTTG          | 2905    |
|                  | perA1_R: TTGCTTCATCCCAGTCAGC          |         |
|                  | <b>Additional sequencing primers:</b> |         |
|                  | perA1_1: TTTGCAGTCCGGCGAAGC           |         |
|                  | perA1_2: ACGCCTAGAGTTCTGCAT           |         |
|                  | perA1_3: ATACTCACGCACACCAAC           |         |
|                  | perA1_4: TCGGAAAGGTCGGCTGTAC          |         |
| <i>perA-2</i>    | perA2_F: ATCCAAGACGCATATCCC           | 2973    |
|                  | perA2_R: ATCCACGCCTATGTAGCTC          |         |
|                  | <b>Additional sequencing primers:</b> |         |
|                  | perA2_1: ACAGCTTTGCCACTCCAAG          |         |
|                  | perA2_2: AGATTTGGCAGTGGAACG           |         |
|                  | perA2_3: GTCTCCATCAGCAACATC           |         |
| <i>perA-3</i>    | perA3_F: GCTTGCTGCGTTTGTAC            | 3058    |
|                  | perA3_R: CTAGCCTCCAGATCTTGTG          |         |
|                  | <b>Additional sequencing primers:</b> |         |
|                  | perA3_1: TATCTCTTCAACATCATCCAG        |         |
|                  | perA3_2: ATCGCAGGAACACTCATCG          |         |
|                  | perA3_3: AGGAAGGCATCAGGCTGG           |         |
|                  | perA3_4: ATTCCGCCAGGATGTAGAG          |         |
| <i>perA-3ΔR*</i> | perA3_F: GCTTGCTGCGTTTGTAC            | 1864    |
|                  | perA-17bp_R: GTACGGATAACCTCAAC        | (E2368) |
|                  | <b>Additional sequencing primers:</b> |         |
|                  | perA3_1: TATCTCTTCAACATCATCCAG        |         |

---

|  |                              |  |
|--|------------------------------|--|
|  | perA3_2: ATCGCAGGAACACTCATCG |  |
|  | perA3_3: AGGAAGGCATCAGGCTGG  |  |

---

|                      |                                     |         |
|----------------------|-------------------------------------|---------|
| <i>perA-qcrA</i>     | perA-mid2_F2: CATCAGGCTGGAGGTGGCCGA | 1451    |
| intergenic<br>region | Ef104_R: CTAAGCTTTGGTCCAAGCTGCG     | (E2368) |

---

<sup>1</sup> Abbreviations: A = adenylation, T = thiolation, C = condensation, M = methylation and R\* = reductase\*.

<sup>2</sup> Product fragment sizes are for amplification of *E. festucae* Fl1 genomic DNA unless *E. festucae* E2368 is indicated in brackets.

**Table S4. Details of sequenced *perA* alleles**

| <b>Species</b>           | <b>Isolate</b> | <b>Allele progenitor<sup>a</sup></b> | <b><i>perA</i> type</b> | <b>Notes<sup>b</sup></b> | <b>Accession #<sup>c</sup></b> |
|--------------------------|----------------|--------------------------------------|-------------------------|--------------------------|--------------------------------|
| <b>Nonhybrid species</b> |                |                                      |                         |                          |                                |
| <i>E. amarillans</i>     | E57            | <i>E. amarillans</i>                 | <i>perA</i>             |                          | <b>JN640285</b>                |
| <i>E. amarillans</i>     | E4668          | <i>E. amarillans</i>                 | <i>perA</i>             |                          |                                |
| <i>E. baconii</i>        | As6            | <i>E. baconii</i>                    | <i>perA</i> -ΔR         |                          | KP347847                       |
|                          | E357/E1031     | <i>E. baconii</i>                    | <i>perA</i>             |                          | KP347874                       |
|                          | E424           | <i>E. baconii</i>                    | <i>perA</i> -ΔR         |                          | KP347851                       |
| <i>E. brachyelytri</i>   | E4804          | <i>E. brachyelytri</i>               | <i>perA</i>             |                          | <b>JN613323</b>                |
| <i>E. bromicola</i>      | AL0434         | <i>E. bromicola</i>                  | <i>perA</i>             |                          | KP347845                       |
|                          | AL0426_2       | <i>E. bromicola</i>                  | <i>perA</i> -ΔR         | START                    | KP347846,<br>KP719965          |
|                          | E501           | <i>E. bromicola</i>                  | <i>perA</i>             |                          | KP347854                       |
|                          | E502           | <i>E. bromicola</i>                  | <i>perA</i>             |                          | <b>JX441995</b>                |
|                          | E799           | <i>E. bromicola</i>                  | <i>perA</i> -ΔR         | STOP@7051                | KP347855                       |
| <i>E. elymi</i>          | E56            | <i>E. elymi</i>                      | <i>perA</i>             |                          | <b>JX402755</b>                |
| <i>E. festucae</i>       | E189           | <i>E. festucae</i>                   | <i>perA</i> -ΔR         |                          | KP347868                       |
|                          | E2368          | <i>E. festucae</i>                   | <i>perA</i> -ΔR         |                          | <b>JN640287</b>                |
|                          | Fg1            | <i>E. festucae</i>                   | <i>perA</i>             | -236@3652                | KP347869                       |
|                          | Fl1            | <i>E. festucae</i>                   | <i>perA</i>             |                          | <b>AB205145</b>                |
| <i>E. mollis</i>         | E3601          | <i>E. mollis</i>                     | <i>perA</i>             | +1@1412,                 | KP347873                       |

|                                            |          |                                            |                 |                                  |                               |
|--------------------------------------------|----------|--------------------------------------------|-----------------|----------------------------------|-------------------------------|
|                                            |          |                                            |                 | +2@3470,<br>+4@6153,<br>+7@6162  |                               |
| <i>E. sylvatica</i>                        | E354     | <i>E. sylvatica</i>                        | <i>perA</i> -ΔR | +1@992,<br>-259@1891,<br>+2@4200 | KP347850,<br>KP719966         |
|                                            | E503     | <i>E. sylvatica</i>                        | <i>perA</i> -ΔR | +1@992,<br>-259@1891,<br>+2@4200 | KP347852                      |
| <i>E. typhina</i>                          | E8       | <i>E. typhina</i>                          | <i>perA</i>     |                                  | <b>JX402754</b>               |
|                                            | E505     | <i>E. typhina</i>                          | <i>perA</i> -ΔR | STOP@2116                        | KP347853,<br>KP719967         |
|                                            | E1022    | <i>E. typhina</i>                          | <i>perA</i> -ΔR |                                  | KP347856                      |
|                                            | ORE04    | <i>E. typhina</i>                          | <i>perA</i> -ΔR | STOP@7045                        | KP347848,<br>KP719969         |
|                                            | ORE06    | <i>E. typhina</i>                          | <i>perA</i> -ΔR | STOP@7045                        | KP347849                      |
|                                            | OR10     | <i>E. typhina</i>                          | <i>perA</i> -ΔR | incomplete                       | KP347870                      |
| <i>E. typhina</i><br>subsp. <i>clarkii</i> | Holcus 3 | <i>E. typhina</i><br>subsp. <i>clarkii</i> | <i>perA</i> -ΔR | STOP@6628                        | KP347859,<br>KP719968         |
| <i>E. typhina</i><br>subsp. <i>poae</i>    | BlaTG-1  | <i>E. typhina</i><br>subsp. <i>poae</i>    | <i>perA</i>     | incomplete                       | KP347875                      |
|                                            | E5819    | <i>E. typhina</i><br>subsp. <i>poae</i>    | <i>perA</i> -ΔR |                                  | <b>JN640289</b> ,<br>KP719970 |
| <b>Hybrid species</b>                      |          |                                            |                 |                                  |                               |
| <i>E. cabralii</i>                         | BlaTG-2  | <i>E. amarillans</i>                       | <i>perA</i>     | incomplete                       | KP347876                      |

|                            |            |                     |                 |                                     |                                    |
|----------------------------|------------|---------------------|-----------------|-------------------------------------|------------------------------------|
|                            | BRLA-00661 |                     |                 |                                     |                                    |
|                            |            | <i>E. typhina</i>   | <i>perA</i>     | incomplete                          | KP347877                           |
| <i>E. siegelii</i>         | e915       | <i>E. festucae</i>  | <i>perA</i> -ΔR |                                     | KP347857,<br>KP719971-<br>KP719973 |
|                            |            | <i>E. bromicola</i> | <i>perA</i> -ΔR | STOP@2839                           | KP347858                           |
| <i>E. uncinata</i>         | e167       | <i>E. bromicola</i> | <i>perA</i>     | -1@5044                             | KP347860                           |
|                            |            | <i>E. typhina</i>   | <i>perA</i>     | +1@7972                             | KP347861                           |
| <i>E. sp. FaTG-2</i><br>G2 | NFe45079   | LAE                 | <i>perA</i>     | +1@1031,<br>-621@1251,<br>-328@3970 | KP347862                           |
|                            |            | <i>E. festucae</i>  | <i>perA</i>     |                                     | KP347863                           |
| <i>E. sp. FaTG-2</i><br>G3 | NFe45115   | LAE                 | <i>perA</i>     | +1@1031,<br>-621@1251,<br>-328@3970 | KP347864                           |
|                            |            | <i>E. festucae</i>  | <i>perA</i>     | STOP@525                            | KP347865                           |
| <i>E. sp. FaTG-3</i>       | NFe1100    | LAE                 | <i>perA</i>     | +1@1031,<br>-621@1251,<br>-328@3970 | KP347866                           |
|                            |            | <i>E. typhina</i>   | <i>perA</i>     |                                     | KP347867                           |
| <i>E. sp.</i>              | e4768      | <i>E. festucae</i>  | <i>perA</i> -ΔR | incomplete                          | KP347871                           |
|                            |            | <i>E. typhina</i>   | <i>perA</i>     | incomplete                          | KP347872                           |

<sup>a</sup>LAE = *Lolium*-associated endophyte



<sup>b</sup>The sign indicates if bases have been deleted (-) or inserted (+), the following number shows the number of bp affected and the number after the "@" symbol shows the coordinates at which, or immediately before which, the insertion or deletion begins, respectively. Small deletions or insertions that do not cause a frameshift mutation are not detailed here. The sizes of large deletions are given relative to the *perA* sequence from *E. festucae* F11. STOP indicates a nonsense mutation, with the number following "@" detailing the coordinate of the causative SNP. START indicates the ATG start codon has been disrupted, though a nearby ATG codon may fill this role.

<sup>c</sup>Accession numbers shown in bold are from previous publications (5, 22).

1. **Schardl CL, Leuchtman A, Tsai HF, Collett MA, Watt DM, Scott DB.** 1994. Origin of a fungal symbiont of perennial ryegrass by interspecific hybridization of a mutualist with the ryegrass choke pathogen, *Epichloë typhina*. *Genetics* **136**:1307-1317.
2. **Schardl CL, Leuchtman A, Chung KR, Penny D, Siegel MR.** 1997. Coevolution by common descent of fungal symbionts (*Epichloë* spp) and grass hosts. *Mol. Biol. Evol.* **14**:133-143.
3. **Schardl CL, Leuchtman A.** 1999. Three new species of *Epichloë* symbiotic with North American grasses. *Mycologia* **91**:95-107.
4. **Moon CD, Craven KD, Leuchtman A, Clement SL, Schardl CL.** 2004. Prevalence of interspecific hybrids amongst asexual fungal endophytes of grasses. *Mol. Ecol.* **13**:1455-1467.
5. **Schardl CL, Young CA, Hesse U, Amyotte SG, Andreeva K, Calie PJ, Fleetwood DJ, Haws DC, Moore N, Oeser B, Panaccione DG, Schweri KK, Voisey CR, Farman ML, Jaromczyk JW, Roe BA, O'Sullivan DM, Scott B, Tudzynski P, An Z, Arnaoudova EG, Bullock CT, Charlton ND, Chen L, Cox M, Dinkins RD, Florea S, Glenn AE, Gordon A, Gueldener U, Harris DR, Hollin W, Jaromczyk J, Johnson RD, Khan AK, Leistner E, Leuchtman A, Li C, Liu J, Liu J, Liu M, Mace W, Machado C, Nagabhyru P, Pan J, Schmid J, Sugawara K, Steiner U, Takach JE, Tanaka E, Webb JS, Wilson EV, Wiseman JL, Yoshida R, Zeng Z.** 2013. Plant-symbiotic fungi as chemical engineers: Multi-genome analysis of the Clavicipitaceae reveals dynamics of alkaloid loci. *PLoS Genet.* **9**.
6. **Schardl CL, Young CA, Pan J, Florea S, Takach JE, Panaccione DG, Farman ML, Webb JS, Jaromczyk J, Charlton ND, Nagabhyru P, Chen L, Shi C, Leuchtman A.** 2013. Currencies of mutualisms: Sources of alkaloid genes in vertically transmitted epichloae. *Toxins* **5**:1064-1088.
7. **White JF.** 1993. Endophyte-host associations in grasses .19. A systematic study of some sympatric species of epichloë in England. *Mycologia* **85**:444-455.
8. **Leuchtman A, Schardl CL.** 1998. Mating compatibility and phylogenetic relationships among two new species of *Epichloë* and other congeneric European species. *Mycol. Res.* **102**:1169-1182.
9. **Moon CD, Tapper BA, Scott B.** 1999. Identification of *Epichloë* endophytes *in planta* by a microsatellite-based PCR fingerprinting assay with automated analysis. *Appl. Environ. Microbiol.* **65**:1268-1279.
10. **Wilkinson HH, Siegel MR, Blankenship JD, Mallory AC, Bush LP, Schardl CL.** 2000. Contribution of fungal loline alkaloids to protection

from aphids in a grass-endophyte mutualism. *Mol. Plant-Microbe Interact.* **13**:1027-1033.

11. **Leuchtmann A.** 1994. Isozyme relationships of *Acremonium* endophytes from 12 *Festuca* species. *Mycol. Res.* **98**:25-33.
12. **Charlton ND, Craven KD, Afkhami ME, Hall BA, Ghimire SR, Young CA.** 2014. Interspecific hybridization and bioactive alkaloid variation increases diversity in endophytic *Epichloë* species of *Bromus laevipes*. *FEMS Microbiol. Ecol.*:doi: 10.1111/1574-6941.12393.
13. **Charlton ND, Craven KD, Mittal S, Hopkins AA, Young CA.** 2012. *Epichloë canadensis*, a new interspecific epichloid hybrid symbiotic with Canada wildrye (*Elymus canadensis*). *Mycologia* **104**:1187-1199.
14. **Tsai HF, Siegel MR, Schardl CL.** 1992. TRANSFORMATION OF ACREMONIUM-COENOPHIALUM, A PROTECTIVE FUNGAL SYMBIONT OF THE GRASS FESTUCA-ARUNDINACEA. *Current Genetics* **22**:399-406.
15. **Johnson LJ, de Bonth ACM, Briggs LR, Caradus JR, Finch SC, Fleetwood DJ, Fletcher LR, Hume DE, Johnson RD, Popay AJ, Tapper BA, Simpson WR, Voisey CR, Card SD.** 2013. The exploitation of epichloae endophytes for agricultural benefit. *Fungal Diversity* **60**:171-188.
16. **Takach JE, Young CA.** 2014. Alkaloid genotype diversity of tall fescue endophytes. *Crop Sci.* **54**:667-678.
17. **Takach JE, Mittal S, Swoboda GA, Bright SK, Trammell MA, Hopkins AA, Young CA.** 2012. Genotypic and chemotypic diversity of *Neotyphodium* endophytes in tall fescue from Greece. *Appl. Environ. Microbiol.* **78**:5501-5510.
18. **Gams W, Petrini O, Schmidt D.** 1990. *Acremonium uncinatum*, a new endophyte in *Festuca pratensis*. *Mycotaxon* **37**:67-71.
19. **Glenn AE, Bacon CW, Price R, Hanlin RT.** 1996. Molecular phylogeny of *Acremonium* and its taxonomic implications. *Mycologia* **88**:369-383.
20. **Leuchtmann A, Bacon CW, Schardl CL, White JF, Jr., Tadych M.** 2014. Nomenclatural realignment of *Neotyphodium* species with genus *Epichloë*. *Mycologia* **106**:202-215.
21. **Craven KD, Blankenship JD, Leuchtmann A, Hignight K, Schardl CL.** 2001. Hybrid fungal endophytes symbiotic with the grass *Lolium pratense*. *Sydowia* **53**:44-73.
22. **Tanaka A, Tapper BA, Popay A, Parker EJ, Scott B.** 2005. A symbiosis expressed non-ribosomal peptide synthetase from a mutualistic fungal endophyte of perennial ryegrass confers protection to the symbiotum from insect herbivory. *Mol. Microbiol.* **57**:1036-1050.
